# Supplementary material for: Hydrogen evolution on nanostructured Ni–Cu foams
Source: Royal Society of Chemistry journal article supplement (doi:10.1039/c5ra06517h), 2015-01-01
Supplement: c5ra06517h1.pdf [file c5ra06517h1.pdf]

## Electronic Supplementary Information

All potentials in the paper were measured vs. SCE and then converted to the reversible hydrogen electrode (RHE) scale. A standard three-electrode system was used for the calibration of the SCE reference, using two identical platinum electrodes. The 8 M KOH electrolyte was pre-saturated with hydrogen gas and then linear scan voltammetry was run at a scan rate of  $10 \text{ mV s}^{-1}$ . The thermodynamic potential (vs. SCE) for the hydrogen electrode reactions is considered to be that at which the current becomes zero. As shown in Figure S1, for the tested 8 M KOH electrolyte, that potential value was  $-1.115 \text{ V}$  vs. SCE. Accordingly, to convert the potentials from the SCE scale to the RHE scale, the following expression was used:  $E_{\text{RHE}} = E_{\text{SCE}} + 1.115 \text{ V}$

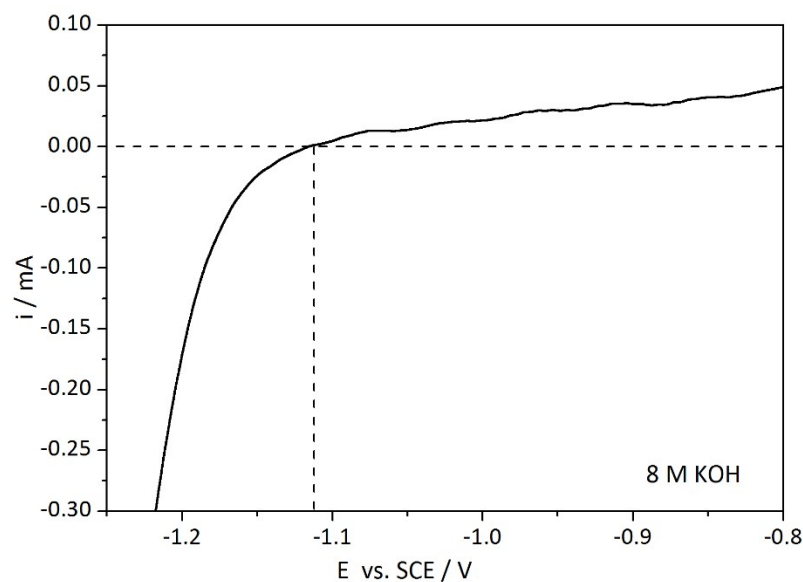

Fig. S1. Calibration of SCE to RHE scale.
